# Supplementary material for: Readily switchable one-pot 5-exo-dig cyclization using a palladium catalyst
Source: Royal Society of Chemistry journal article supplement (doi:10.1039/c6ra25857c), 2017-01-01

Supplementary Information

**Readily switchable one-pot 5-exo-dig cyclization using palladium catalyst**

Jaishree Mali, Balaram S. Takale and Vikas N. Telvekar<sup>a\*</sup>

<sup>a</sup>Department of Pharmaceutical Sciences and Technology, Institute of Chemical Technology,  
N. Parekh Marg, Matunga, Mumbai-400 019, India  
E-mail: vikastelvekar@rediffmail.com

**Contents**

|                                                                      |               |
|----------------------------------------------------------------------|---------------|
| <b>1. General information</b>                                        | <b>S2</b>     |
| <b>2. General procedures and analytical data</b>                     | <b>S2-S7</b>  |
| <b>3. References</b>                                                 | <b>S8</b>     |
| <b>4. <sup>1</sup>H, <sup>13</sup>C NMR spectra and mass spectra</b> | <b>S9-S20</b> |

## 1. General information

All chemicals were purchased from Sigma Aldrich, S. D. Fine Chemicals, Lancaster (Alfa-Aesar) and commercial suppliers. Commercially available reagents were used without further purification. All reaction mixtures were stirred magnetically and were monitored by thin-layer chromatography using Merck silica gel 60 F-254 aluminum sheets, visualized with UV light and then developed using iodine. Dry solvents were used for reaction wherever mentioned. Products were purified by column chromatography on a silica gel (100–200) mesh with distilled solvents. Melting points are uncorrected.  $^1\text{H}$  NMR (400 MHz) and  $^{13}\text{C}$  NMR (125 MHz) spectra were recorded on Agilent Technology MR400 spectrometer. Deuterated chloroform was used as the solvent and chemical shifts are reported in parts per million ( $\delta$ ) relative to tetramethylsilane as an internal standard. Mass spectra were recorded by Shimadzu instrument in Electro Spray Ionization (ESI) mode.

## 2. General procedures and analytical data

### General procedure for the synthesis of dihydrooxazoles 3

A sealable reaction tube was charged with propargylamine (**2a**, 1.81 mmol), dry toluene (2mL), triethylamine (2.17 mmol), benzoyl chloride (**1a**, 1.82 mmol) and  $\text{Pd}(\text{OAc})_2$  (5 mol %) sequentially. The tube was sealed immediately and contents in the tube were stirred at 100 °C for 5 h. The reaction mixture was then concentrated under reduced pressure and the residue was purified by silica gel column chromatography (Eluent: Hexane/ethyl acetate) to obtain the desired oxazoline derivatives in 45 to 92 % yields.

### 2-phenyl-5-methylene-4, 5-dihydrooxazole (**3a**)<sup>1,2</sup>

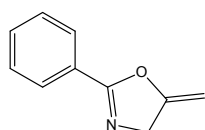

Yellow oil;  $^1\text{H}$  NMR (400 MHz,  $\text{CDCl}_3$ )  $\delta$  7.96 (m, 2H), 7.45 (m, 3H), 4.79 (q,  $J = 3.0$  Hz, 1H), 4.63 (t,  $J = 3.0$  Hz, 2H), 4.34 (q, 3.0 Hz, 1H);  $^{13}\text{C}$  NMR (101 MHz,  $\text{CDCl}_3$ )  $\delta$  163.69, 158.76, 131.75, 128.64, 128.43, 127.95, 126.70, 83.71, 57.67.

### 5-methylene-2-(p-tolyl)-4, 5-dihydrooxazole (**3b**)<sup>3</sup>

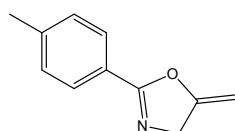

Colorless liquid;  $^1\text{H}$  NMR (400 MHz,  $\text{CDCl}_3$ )  $\delta$  7.84 (d,  $J = 8.0$  Hz, 2H), 7.22 (d,  $J = 8.0$  Hz, 2H), 4.77 (q,  $J = 5.0$  Hz, 1H), 4.61 (t,  $J = 2.0$  Hz, 2H), 4.32 (q,  $J = 3.0$  Hz, 1H), 2.38 (s, 3H);  $^{13}\text{C}$  NMR (101 MHz,  $\text{CDCl}_3$ )  $\delta$  163.75, 158.86, 142.23, 129.36, 129.17, 127.91, 127.75, 125.85, 125.08, 123.96, 123.92, 83.51, 57.64, 21.56.

### 5-methylene-2-(m-tolyl)-4, 5-dihydrooxazole (3c) <sup>1</sup>

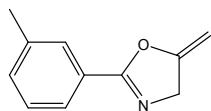

Pale yellow viscous oil;  $^1\text{H}$  NMR (400 MHz,  $\text{CDCl}_3$ ):  $\delta = 7.81$  (s, 1H), 7.77 (t,  $J = 4.0$  Hz, 1H), 7.30 (dd,  $J = 4.0$  Hz, 1 Hz, 2H), 4.80 (q,  $J = 3$  Hz, 1H), 4.63 (t,  $J = 3$  Hz, 2H), 4.35 (q,  $J = 3$  Hz, 1H), 2.39 (s, 3H);  $^{13}\text{C}$  NMR (101 MHz,  $\text{CDCl}_3$ )  $\delta = 163.75$ , 158.80, 138.4, 132.7, 128.6, 128.5, 126.7, 125.2, 83.8, 57.7, 21.4.

### 2-(4-fluorophenyl)-5-methylene-4, 5-dihydrooxazole (3d) <sup>3, 4</sup>

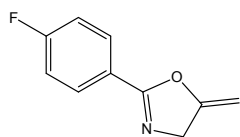

White solid, M.P 57 °C;  $^1\text{H}$  NMR (400 MHz,  $\text{CDCl}_3$ )  $\delta$  7.98 – 7.94 (m, 2H), 7.12-7.08 (m, 2H), 4.79 (q,  $J = 3.0$  Hz, 1H), 4.62 (t,  $J = 3.0$  Hz, 2H), 4.35 (q,  $J = 3.0$  Hz, 1H);  $^{13}\text{C}$  NMR (101 MHz,  $\text{CDCl}_3$ )  $\delta$  166.14, 163.69, 161.83, 158.65, 130.30, 130.21, 115.79, 115.57, 83.92, 57.73.

### 2-(3-nitrophenyl)-5-methylene-4, 5-dihydrooxazole (3e) <sup>1</sup>

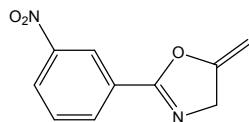

Yellow solid; M.P 123-124°C;  $^1\text{H}$  NMR (400 MHz,  $\text{CDCl}_3$ )  $\delta$  8.80 (dd,  $J=1$  Hz, 1H), 8.36-8.34 (m, 2H), 7.65 (t,  $J=8.0$  Hz, 1H), 4.89 (q,  $J = 3$  Hz, 1H), 4.65 (t,  $J = 3$  Hz, 2H), 4.44 (q,  $J = 3$  Hz, 1H);  $^{13}\text{C}$  NMR (101 MHz,  $\text{CDCl}_3$ )  $\delta$  161.75, 158.3, 149.1, 132.6, 129.7, 128.6, 126.3, 123.0, 84.9, 57.9.

### 2-(2-bromophenyl)-5-methylene-4, 5-dihydrooxazole (3f) <sup>2</sup>

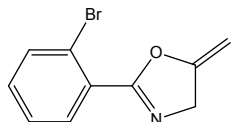

Pale yellow liquid; <sup>1</sup>H NMR (400 MHz, CDCl<sub>3</sub>) δ 7.78 (dd, *J* = 8.0 Hz, 2.0 Hz, 1H), 7.69 (dd, *J* = 8.0 Hz, 1H, 1H), 7.36 (m, 2H), 4.86-4.74 (m, 1H), 4.72 (t, *J* = 3 Hz, 2H), 4.39 (q, *J* = 3Hz 1H); <sup>13</sup>C NMR (101 MHz, CDCl<sub>3</sub>) δ 162.6, 158.4, 134.3, 132.1, 131.5, 128.4, 127.2, 121.9, 84.1, 58.2.

### 2-(3, 5-dichlorophenyl)-5-methylene-4,5-dihydrooxazole (3g)<sup>1</sup>

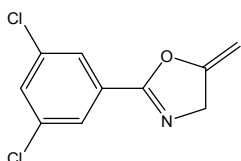

White solid; M.P 73-74°C, <sup>1</sup>H NMR (400 MHz, CDCl<sub>3</sub>) δ 7.86 (d, *J* = 2 Hz, 2H), 7.50 (t, *J* = 2 Hz, 1H), 4.84 (q, *J* = 3.0 Hz, 1H), 4.65 (t, *J* = 3.0 Hz, 2H), 4.40 (q, *J* = 3.0 Hz, 1H); <sup>13</sup>C NMR (101 MHz, CDCl<sub>3</sub>) δ 161.6, 158.3, 135.4, 131.7, 129.5, 126.4, 84.7, 57.71.

### 5-methylene-2-styryl-4, 5-dihydrooxazole (3h) <sup>4,5</sup>

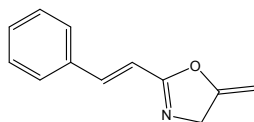

White solid, M.P. 90-91°C; <sup>1</sup>H NMR (400 MHz, CDCl<sub>3</sub>) δ 7.50-7.32 (m, 6H), 6.61 (d, *J* = 17 Hz, 1H), 4.74 (dd, *J* = 5.0 Hz, 3.0Hz, 1H), 4.56 (s, 2H), 4.30 (d, 9.0 Hz, 1H); <sup>13</sup>C NMR (101 MHz, CDCl<sub>3</sub>) δ 163.48, 158.47, 140.78, 134.87, 129.74, 128.86, 127.55, 114.09, 83.32, 57.71.

### 5-methylene-2-undecyl-4, 5-dihydrooxazole (3i)

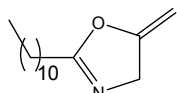

Colorless liquid; <sup>1</sup>H NMR (400 MHz, CDCl<sub>3</sub>) δ 4.59 (d, *J* = 2.0 Hz, 1H), 4.35 (s, 2H), 4.19 (s, 1H), 1.66 – 1.56 (m, 2H), 1.21 (s, 18H), 0.83 (t, *J* = 6.0 Hz, 3H); <sup>13</sup>C NMR (101 MHz, CDCl<sub>3</sub>) δ <sup>13</sup>C NMR (101 MHz, CDCl<sub>3</sub>) δ 167.68, 159.01, 82.82, 57.08, 31.85, 29.55, 29.39, 29.28, 29.17, 29.08, 28.05, 25.42, 22.63, 21.38, 14.05; GC-MS (EI, 70eV): *m/z* 237 (6%, M<sup>+</sup>), 208 (4%), 194 (12%), 166 (8%), 139(30%), 124(7%), 110(59%), 97(100%), 67(5%), 41(17%). Calculated for C<sub>15</sub>H<sub>27</sub>NO: C, 75.90; H, 11.46; N, 5.90; found C, 75.83; H, 11.38; N, 5.81

### 2-(2-furyl)-5-methylene-4,5-dihydrooxazole (3j)<sup>4</sup>

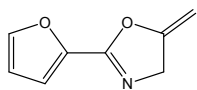

Colourless liquid; <sup>1</sup>H NMR (400 MHz, CDCl<sub>3</sub>) δ 7.52 (d, *J* = 1.0 Hz, 1H), 6.96 (d, *J* = 3 Hz, 1H), 6.45 (dd, *J* = 3 Hz, *J* = 2 Hz, 1H), 4.74 (q, *J* = 3.0 Hz, 1H), 4.56 (t, *J* = 3.0 Hz, 2H), 4.31 (q, *J* = 3.0 Hz, 1H); <sup>13</sup>C NMR (101 MHz, CDCl<sub>3</sub>) δ 158.04, 155.80, 145.57, 141.86, 114.86, 111.50, 84.09, 57.30.

### General procedure for the synthesis of oxazoles 4

A sealable reaction tube was charged with propargylamine (**2a**, 1.81 mmol), dry toluene (2 mL), benzoyl chloride (**1a**, 1.82 mmol), Pd(OAc)<sub>2</sub> (5 mol %) and acetic acid (1.81 mmol) sequentially. The tube was sealed immediately and contents in the tube were stirred at 100°C for 24 h. The reaction mixture was then concentrated under reduced pressure and the residue was purified by silica gel column chromatography (Eluent: Hexane/ethyl acetate) to obtain the desired oxazole derivatives in 42 to 90% yields.

### 2-phenyl-5-methyl-1,3-oxazole (4a)<sup>3</sup>

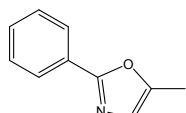

Colorless oil; <sup>1</sup>H NMR (400 MHz, CDCl<sub>3</sub>) δ 8.02 – 7.97 (m, 2H), 7.44-7.37 (m, 3H), 6.81 (s, 1H), 2.37 (s, 3H); <sup>13</sup>C NMR (101 MHz, CDCl<sub>3</sub>) δ 160.70, 148.83, 129.79, 128.66, 127.74, 125.89, 124.13, 10.92.

### 5-methyl-2-(p-tolyl)-1,3-oxazole (4b)<sup>7</sup>

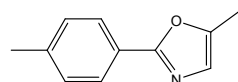

Colorless liquid; <sup>1</sup>H NMR (400 MHz, CDCl<sub>3</sub>) δ 7.89 (d, *J* = 8.0 Hz, 2H), 7.24 (d, *J* = 8.0 Hz, 2H), 6.81 (s, 1H), 2.39 (s, 3H), 2.38 (s, 3H); <sup>13</sup>C NMR (101 MHz, CDCl<sub>3</sub>) δ 160.70, 148.83, 139.9, 129.2, 125.7, 124.9, 123.8, 21.3, 10.92.

### 5-methyl-2-(4-methoxyphenyl)-1,3-oxazole (4c) <sup>6</sup>

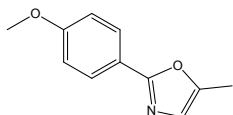

White Solid, M.P. 62-63 °C; <sup>1</sup>H NMR (400 MHz, CDCl<sub>3</sub>) δ 7.93-7.90 (d, *J* = 9.0 Hz, 2H), 6.95-6.94 (d, *J* = 9.0 Hz, 2H), 6.77 (s, 1H), 3.84 (s, 3H), 2.36 (s, 3H); <sup>13</sup>C NMR (101 MHz, CDCl<sub>3</sub>) δ 160.92, 160.73, 148.19, 127.52, 123.81, 120.64, 114.07, 55.31, 10.98.

### 5-methyl-2-(4-nitrophenyl)-1,3-oxazole (4d) <sup>3</sup>

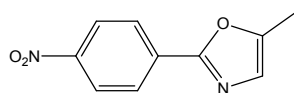

Yellow solid; M.P 116-117°C, <sup>1</sup>H NMR (400 MHz, CDCl<sub>3</sub>) δ 8.30 (d, *J* = 9.0 Hz, 2H), 8.15 (d, *J* = 9.0 Hz, 2H), 6.94 (s, 1H), 2.44 (s, 3H); <sup>13</sup>C NMR (101 MHz, CDCl<sub>3</sub>) δ 158.5, 150.7, 148.83, 133.1, 126.7, 125.4, 124.3, 29.7, 11.0.

### 5-methyl-2-(3-nitrophenyl)-1,3-oxazole (4e) <sup>3</sup>

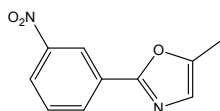

Yellow solid, M.P.134-136°C; <sup>1</sup>H NMR (400 MHz, CDCl<sub>3</sub>) δ 8.81 (s, 1H), 8.31-8.23 (m, 2H), 7.63-7.59 (t, *J* = 8.0 Hz, 1H), 6.89 (s, 1H), 2.41 (s, 3H); <sup>13</sup>C NMR (101 MHz CDCl<sub>3</sub>) δ 158.91, 150.15, 148.88, 131.42, 129.85, 129.29, 124.81, 124.21, 120.80, 10.96.

### 2-(2-fluorophenyl)-5-methylene-1,3-oxazole (4f)

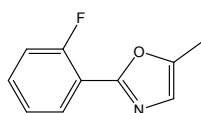

Colorless liquid; <sup>1</sup>H NMR (400 MHz, CDCl<sub>3</sub>) δ 7.98 (t, *J* = 7.0 Hz, 1H), 7.38 (dd, *J* = 13.0, 7.0 Hz, 1H), 7.25 – 7.17 (m, 2H), 6.90 (s, 1H), 2.40 (s, 3H); <sup>13</sup>C NMR (101 MHz, CDCl<sub>3</sub>) δ 161.04, 158.49, 149.19, 131.34, 129.12, 124.35, 124.25, 124.21, 116.87, 116.66, 11.04; GC-MS (EI, 70eV): *m/z* 177.10 (36%, M<sup>+</sup>), 148.09 (12%), 134.07 (100%), 107.08 (63%), 75.08 (28%), 43.08 (34%). Calculated for C<sub>10</sub>H<sub>8</sub>FNO: C, 67.79; H, 4.55; N, 7.91; found C, 67.84; H, 4.58; N, 7.82

### 5-methyl-2-(3,4-dimethoxyphenyl)-1,3-oxazole (4g)

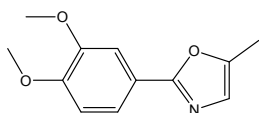

Pale yellow solid, 74-76 °C; <sup>1</sup>H NMR (400 MHz, CDCl<sub>3</sub>) δ 7.57 – 7.51 (m, 2H), 6.91 (d, *J* = 8.0 Hz, 1H), 6.78 (s, 1H), 3.95 (s, 3H), 3.92 (s, 3H) 2.37 (s, 3H); <sup>13</sup>C NMR (101 MHz, CDCl<sub>3</sub>) δ 160.73, 150.51, 149.02, 148.39, 123.86, 120.74, 118.98, 110.91, 108.70, 55.79, 11.12; GC-MS (EI, 70eV): *m/z* 219.13 (57%, M<sup>+</sup>), 204.11 (20%), 176.11 (44%), 149.11 (30%), 133.10 (37%), 121.08 (46%), 91.10 (18%), 77.10 (31%), 63.08 (68%), 43.08 (100%). Calculated for C<sub>12</sub>H<sub>13</sub>NO<sub>3</sub>: C, 65.74; H, 5.98; N, 6.39; found C, 65.78; H, 5.89; N, 6.31

### 5-methyl-2-styryl-1,3-oxazole (4h) <sup>8</sup>

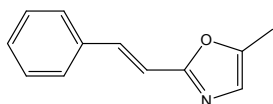

Yellow solid; M.P 53-54 °C; <sup>1</sup>H NMR (400 MHz, CDCl<sub>3</sub>) δ 7.49-7.53 (m, 2H), 7.42 (d, *J* = 16 Hz, 1H), 7.33-7.39 (m, 2H), 7.30-7.32 (m, 1H) 6.90 (d, *J* = 16 Hz, 1H), 6.79 (s, 1H), 2.37 (s, 3H); <sup>13</sup>C NMR (101 MHz, CDCl<sub>3</sub>) δ 160.70, 148.65, 135.7, 134.9, 128.9, 128.83, 127.0, 124.2, 114.03, 11.03.

### 2-benzyl-5-methyl-1,3-oxazole (4i) <sup>4</sup>

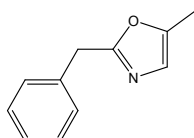

Colourless oil; <sup>1</sup>H NMR (400 MHz, CDCl<sub>3</sub>) δ 7.11 (m, 5H), 6.42 (s, 1H), 3.87(s, 2H), 2.07 (s, 3H); <sup>13</sup>C NMR (101 MHz, CDCl<sub>3</sub>) δ 161.70, 149.8, 137.0, 129.6, 129.3, 127.6, 123.5, 35.4, 11.40.

### 2-(furan-2-yl)-5-methyl-1,3-oxazole (4j) <sup>3</sup>

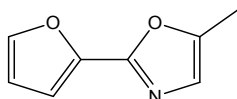

Yellow solid; M.P 37-38°C, <sup>1</sup>H NMR (400 MHz, CDCl<sub>3</sub>) δ 7.53-7.52 (m, 1H), 6.95 (d, *J* = 3.0 Hz, 1H), 6.82 (s, 1H), 6.52-6.50 (m, 1H), 2.37 (d, *J* = 1Hz, 3H); <sup>13</sup>C NMR (101 MHz, CDCl<sub>3</sub>) δ 153.6, 148.4, 143.8, 143.1, 123.8, 111.6, 110.03, 10.80.

### 3. References

- 1) A. S. K. Hashmi, M. C. Blanco Jaimes, A. M. Schuster and F. Rominger, *J. Org. Chem.*, 2012, **77**, 6394–6408.
- 2) X. Meng and S. Kim, *Org. Biomol. Chem.*, 2011, **9**, 4429–31.
- 3) G. C. Senadi, W. Hu and J. J. Wang, *Org. Lett.*, 2012, **14**, 4478–4481.
- 4) J. P. Weyrauch, A. S. K. Hashmi, A. Schuster, T. Hengst, S. Schetter, A. Littmann, M. Rudolph, M. Hamzic, J. Visus, F. Rominger, W. Frey and J. W. Bats, *Chem. - A Eur. J.*, 2010, **16**, 956–963.
- 5) V. H. L. Wong, A. J. P. White, T. S. Hor and K. K. Hii, *Adv. Synth. Catal.*, 2015, **357**, 3943–3948.
- 6) A. Herrera, R. Martinez-Alvarez, P. Ramiro, D. Molero and J. Almy, *J. Org. Chem.*, 2006, **71**, 3026–3032.
- 7) R. L. Melen, M. M. Hansmann, A. J. Lough, A. S. K. Hashmi and D. W. Stephan, *Chem. Eur. J.*, 2013, **19**, 11928–11938.
- 8) S. K. Hashmi, J. P. Weyrauch, W. Frey and J. W. Bats, *Org. Lett.*, 2004, **6**, 4391–4394



#### 4. $^1\text{H}$ , $^{13}\text{C}$ NMR spectra and mass spectra

$^1\text{H}$  NMR spectrum of 2-phenyl-5-methylene-4,5-dihydrooxazole (**3a**)

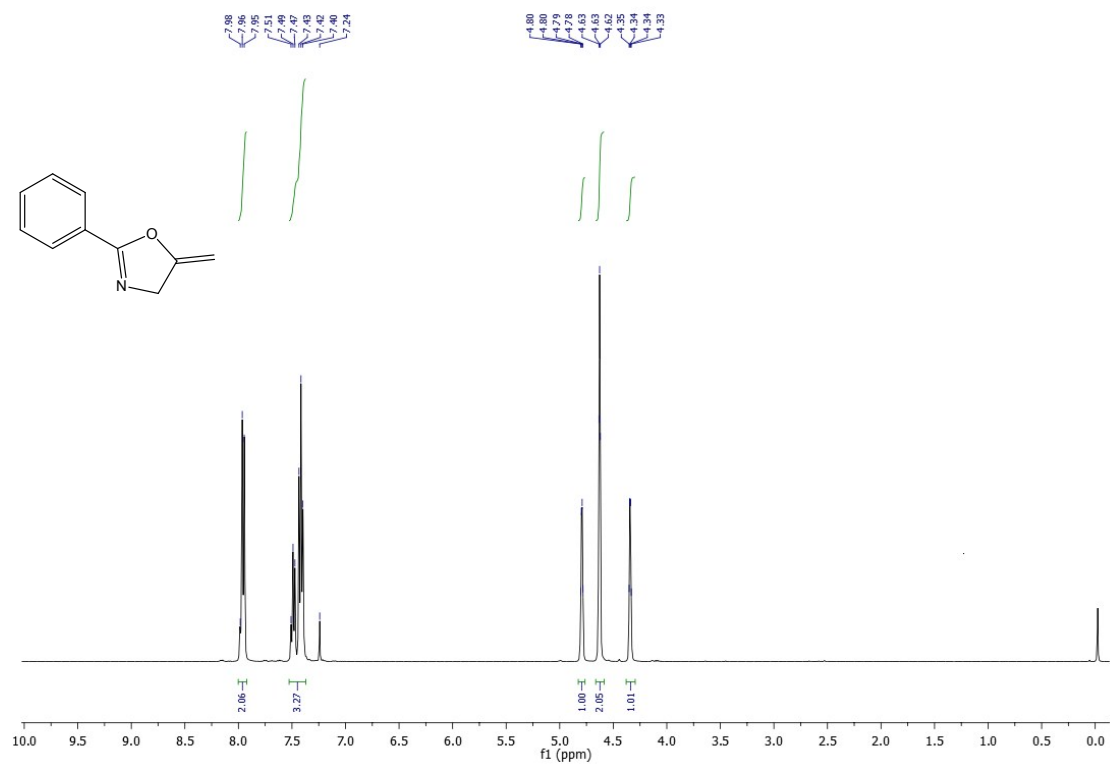

$^{13}\text{C}$  NMR spectrum of 2-phenyl-5-methylene-4,5-dihydrooxazole (**3a**)

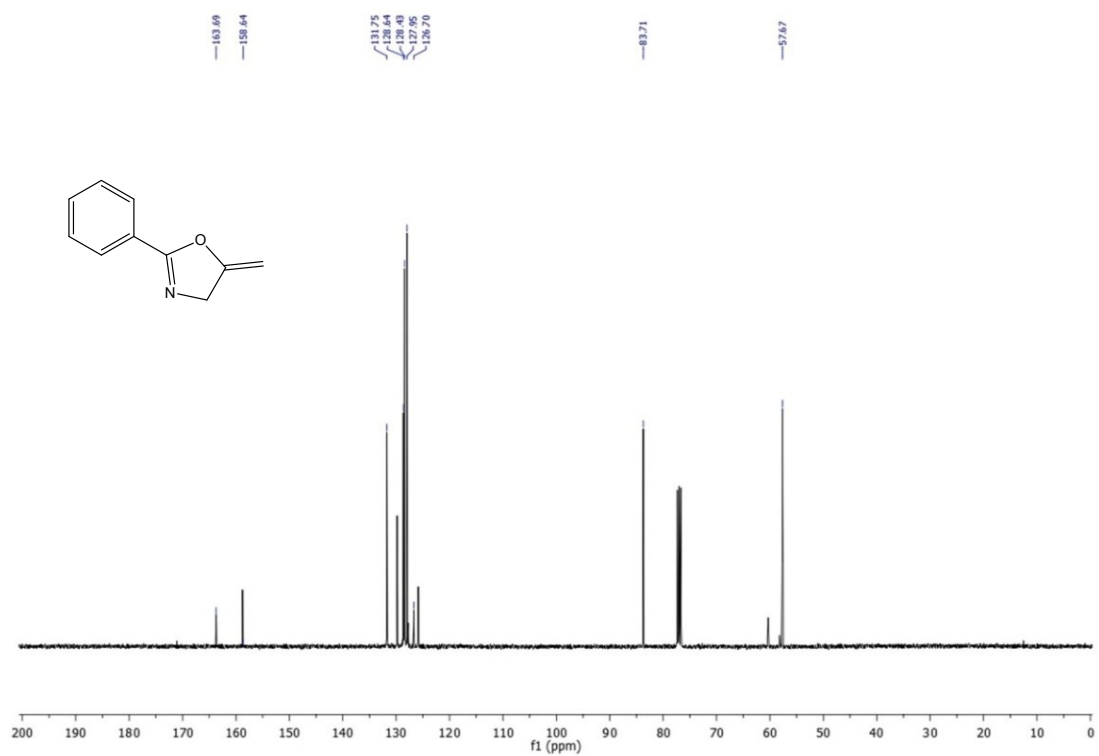

<sup>1</sup>H NMR spectrum of 5-methylene-2-(p-tolyl)-4,5-dihydrooxazole (**3b**)

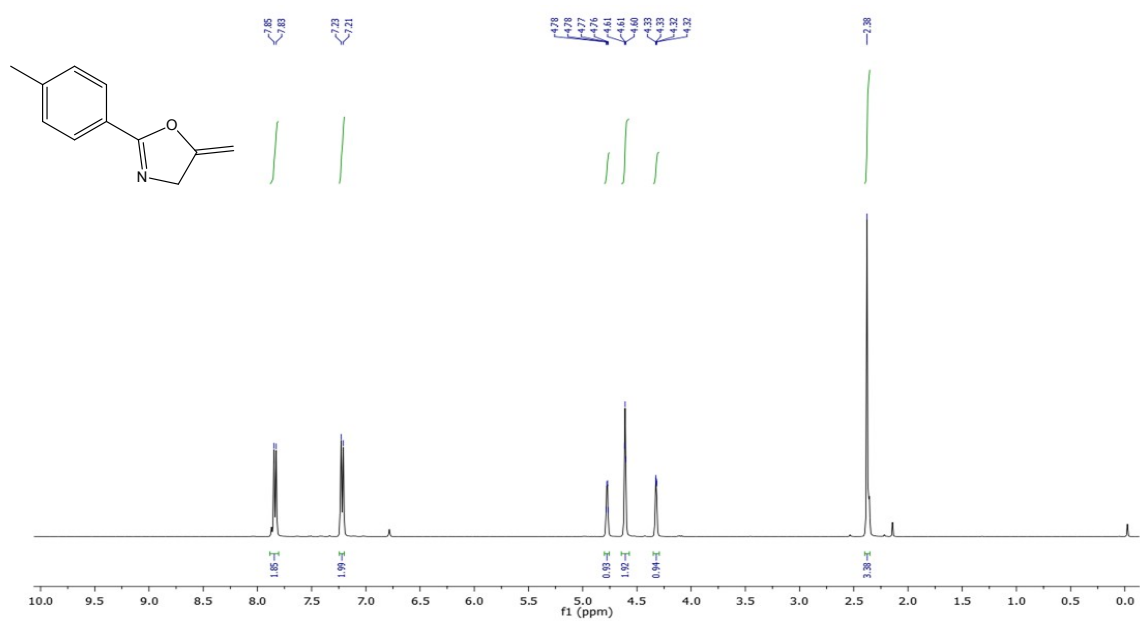

<sup>13</sup>C NMR spectrum of 5-methylene-2-(p-tolyl)-4,5-dihydrooxazole (**3b**)

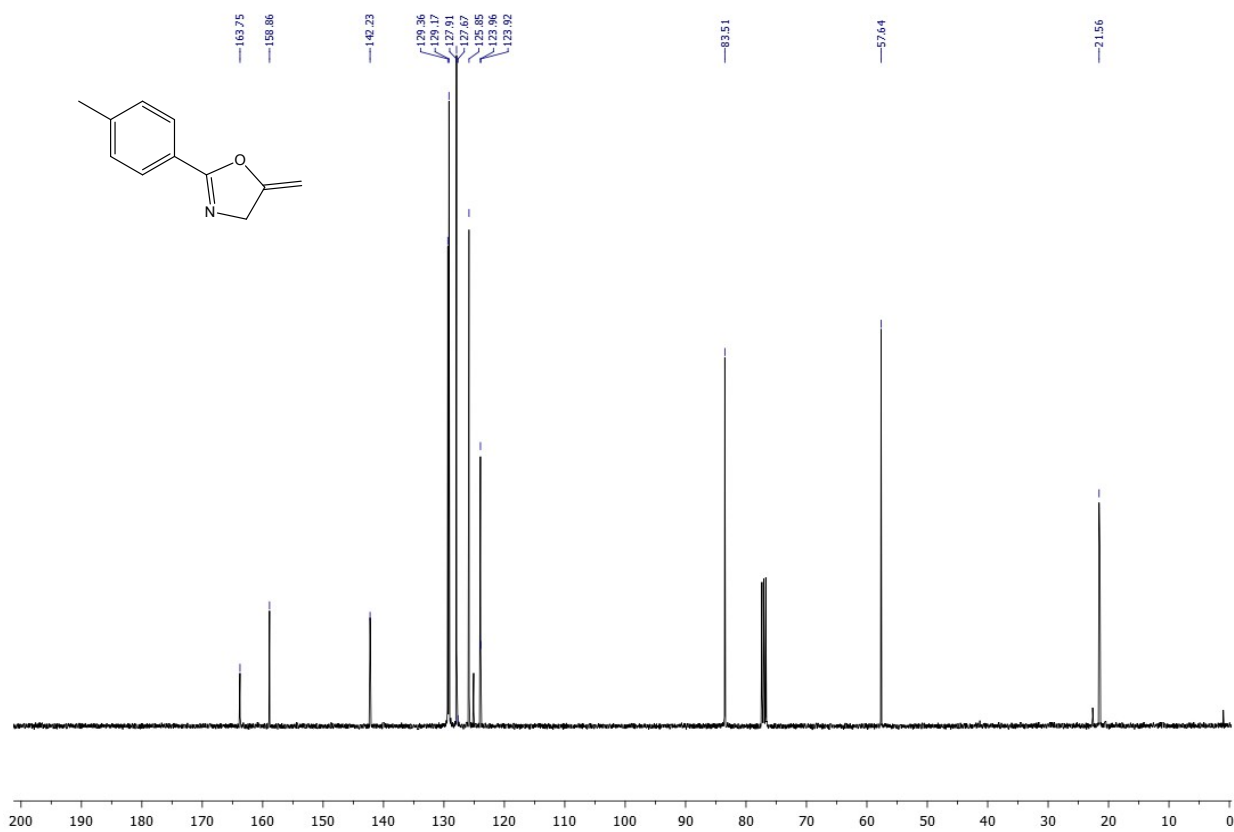

$^1\text{H}$  NMR spectrum of 2-(4-fluorophenyl)-5-methylene-4,5-dihydrooxazole (**3d**)

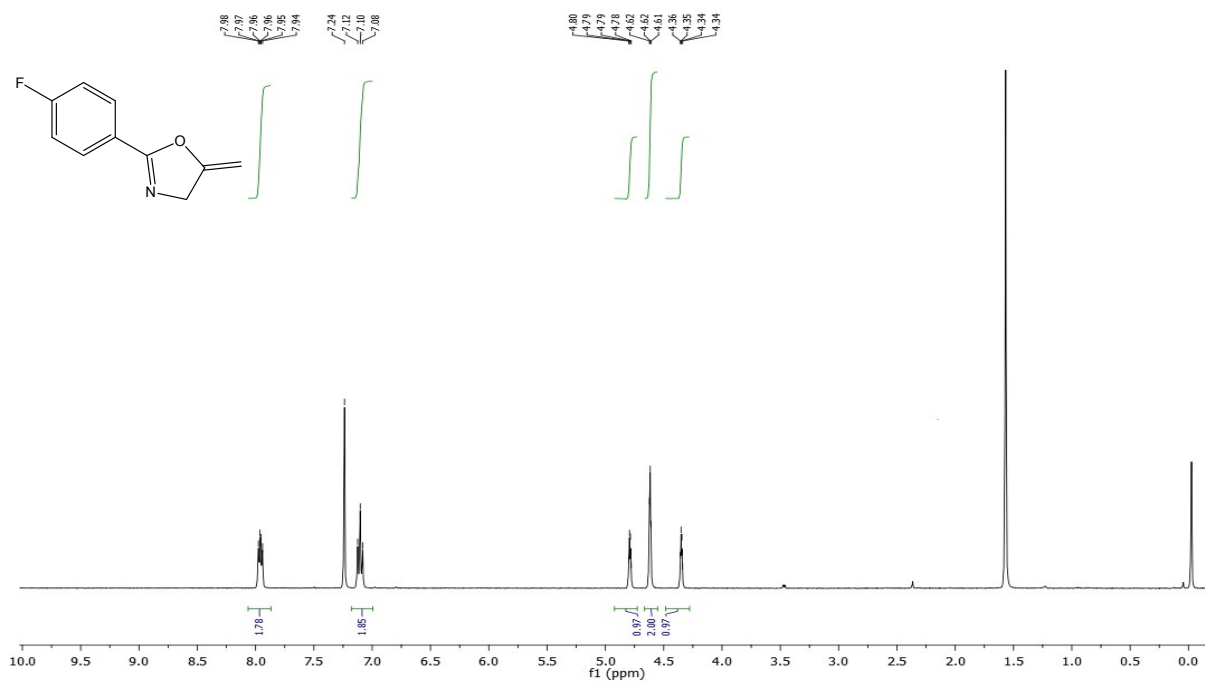

$^{13}\text{C}$  NMR spectrum of 2-(4-fluorophenyl)-5-methylene-4,5-dihydrooxazole (**3d**)

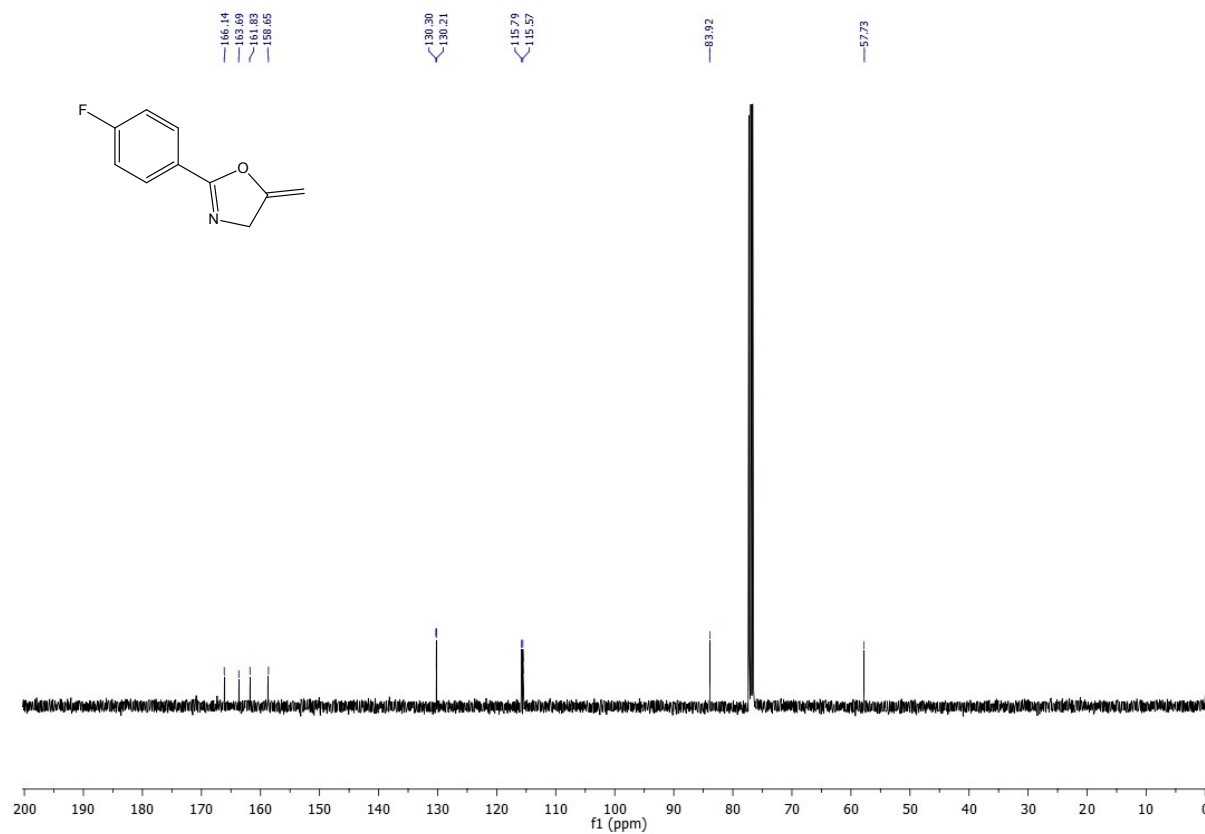

$^1\text{H}$  NMR spectrum of 5-methylene-2-styryl-4,5-dihydrooxazole (**3h**)

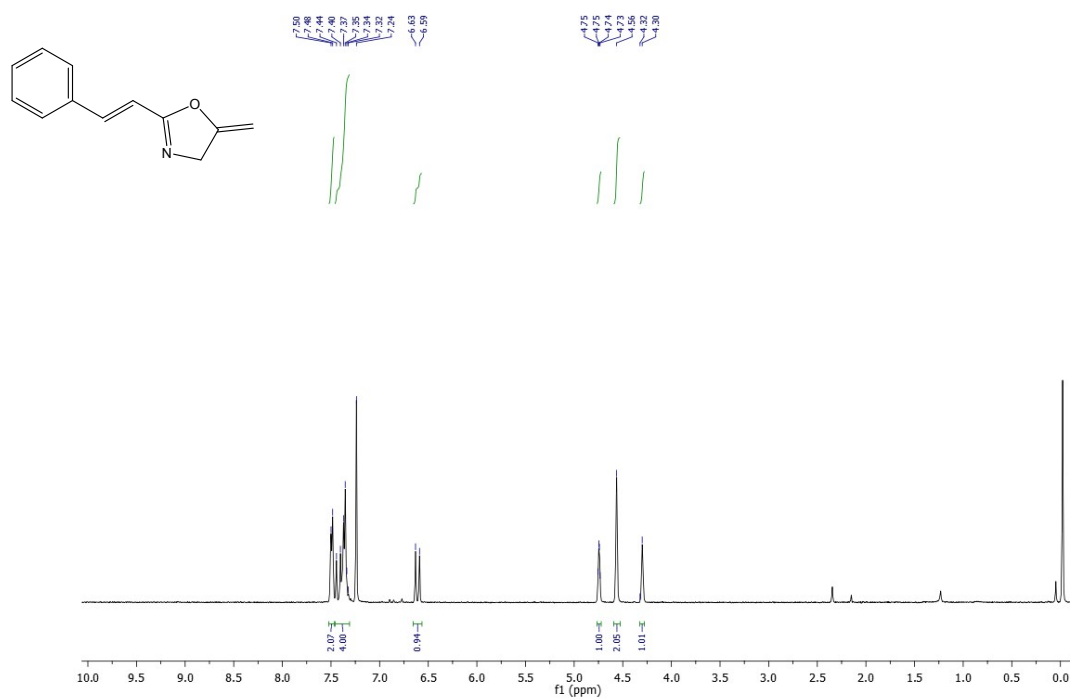

$^{13}\text{C}$  NMR spectrum of 5-methylene-2-styryl-4,5-dihydrooxazole (**3h**)

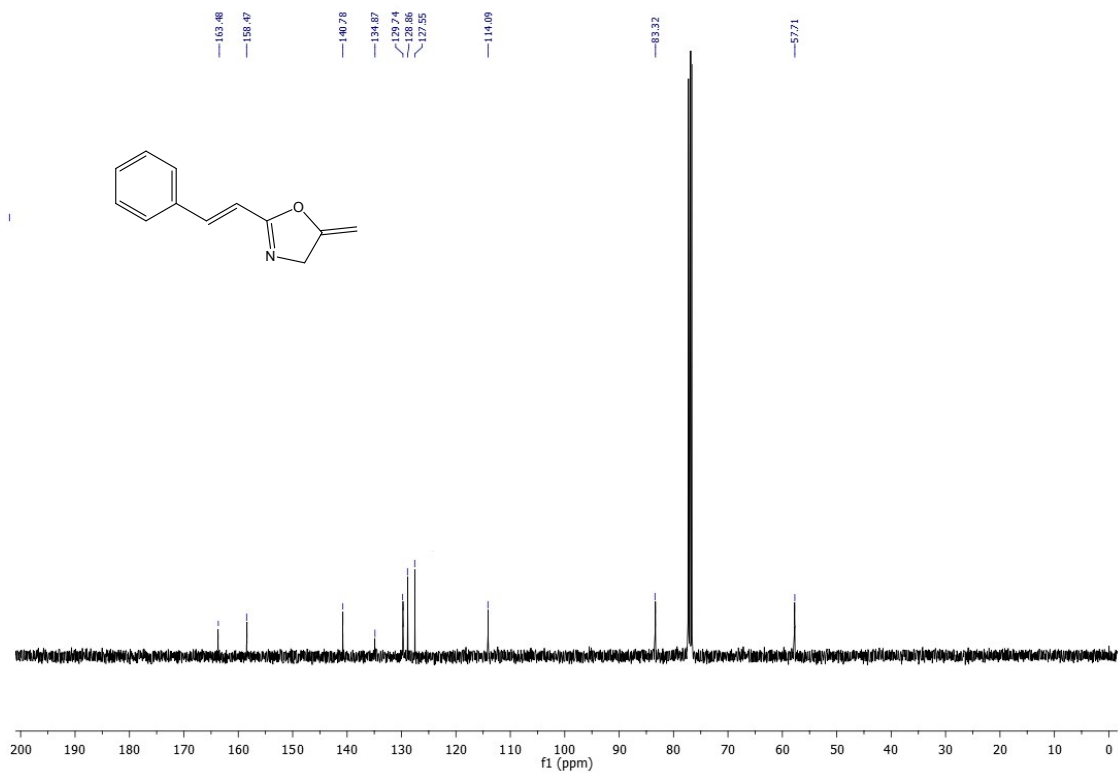

$^1\text{H}$  NMR spectrum of 5-methylene-2-undecyl-4, 5-dihydrooxazole (**3i**)

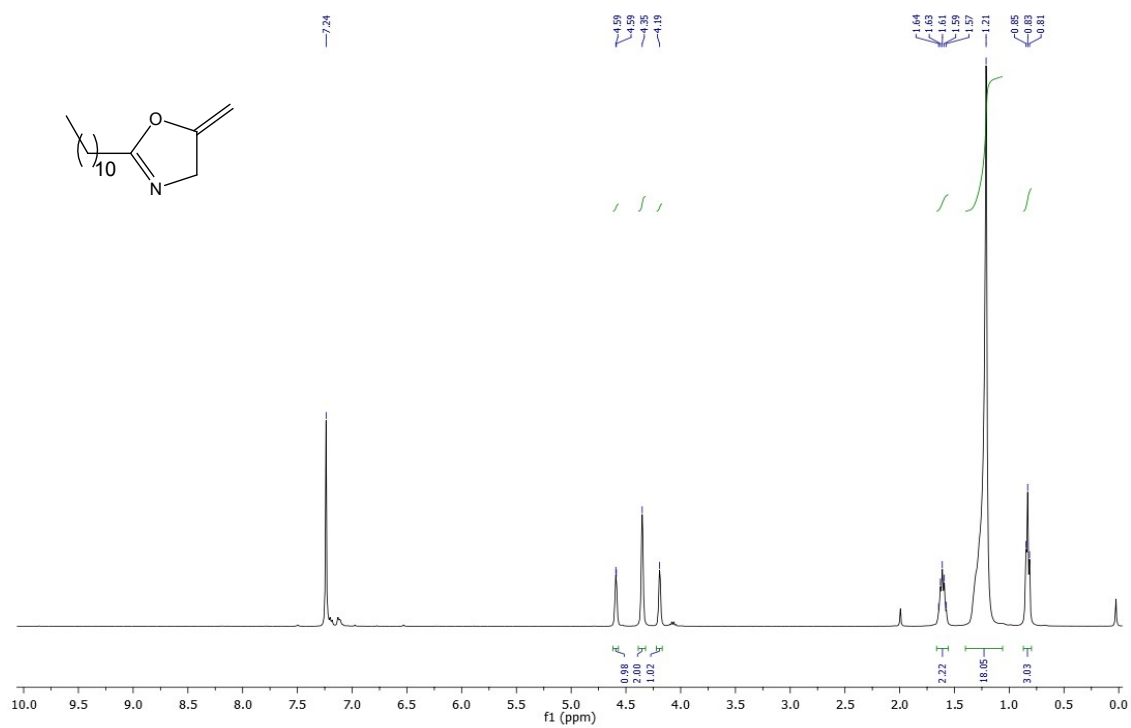

$^{13}\text{C}$  NMR spectrum of 5-methylene-2-undecyl-4, 5-dihydrooxazole (**3i**)

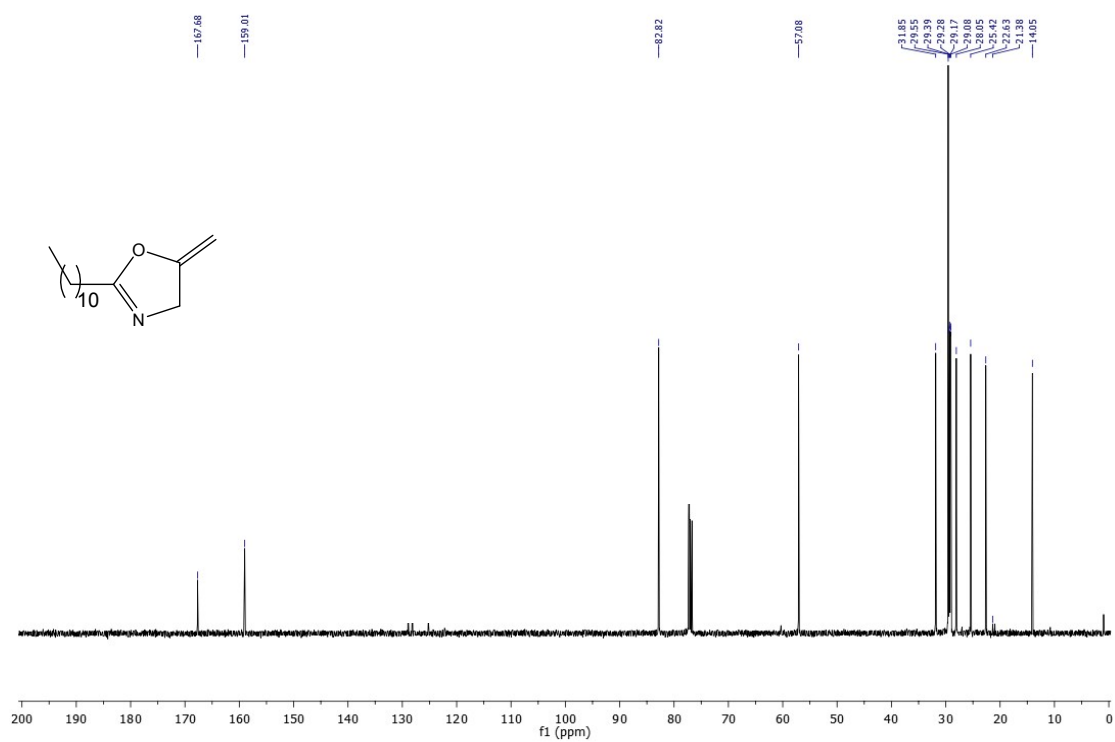

GC-MS Spectrum of 5-methylene-2-undecyl-4, 5-dihydrooxazole (**3i**)

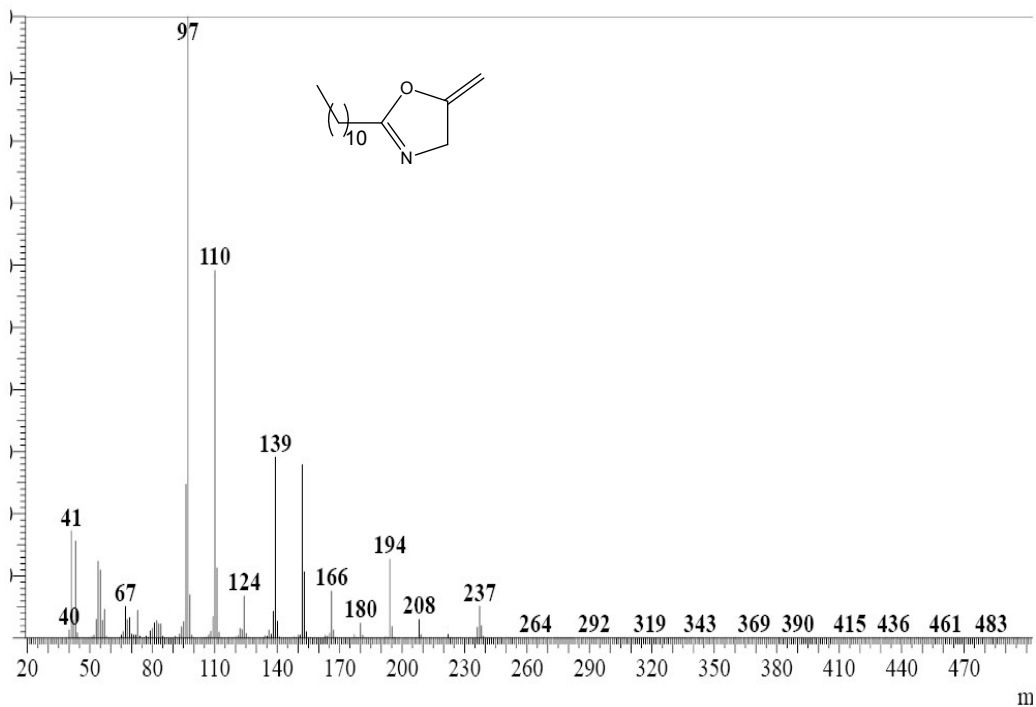

<sup>1</sup>H NMR spectrum of 2-phenyl-5-methyl-1,3-oxazole (**4a**)

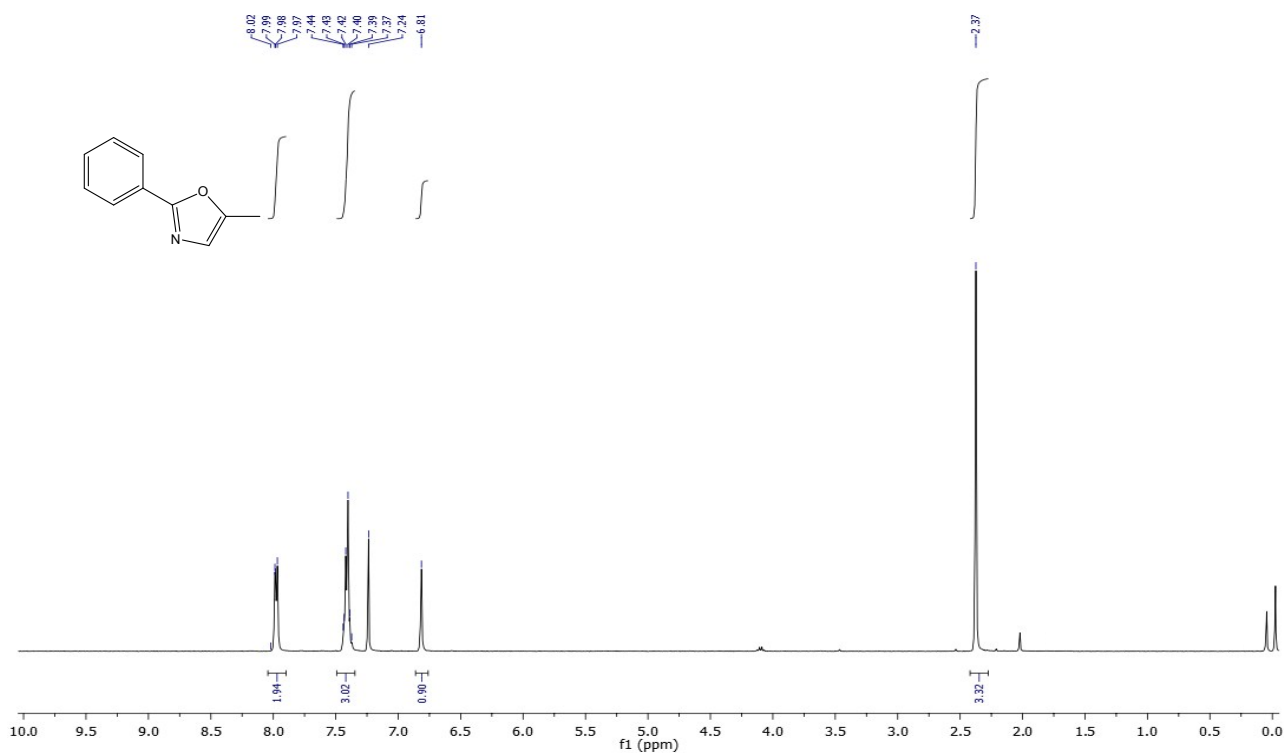

$^{13}\text{C}$  NMR spectrum of 2-phenyl-5-methyl-1,3-oxazole (**4a**)

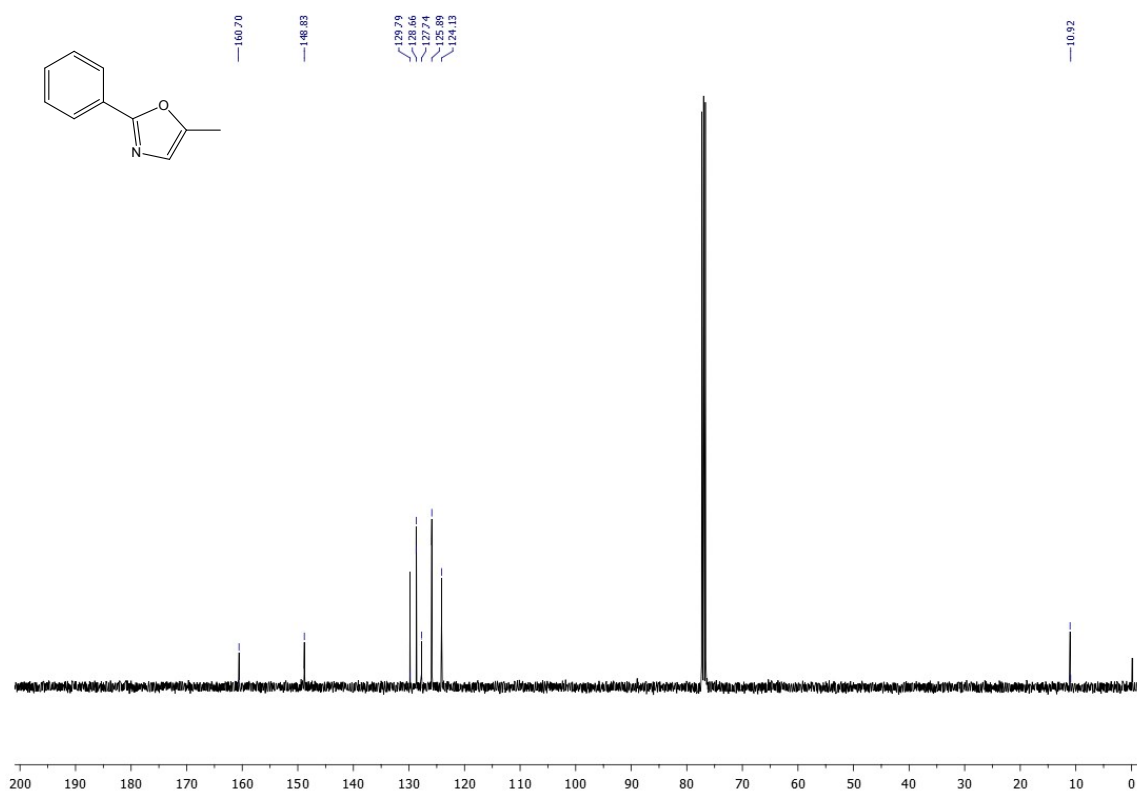

$^1\text{H}$  NMR spectrum of 5-methyl-2-(4-methoxyphenyl)-1,3-oxazole (**4c**)

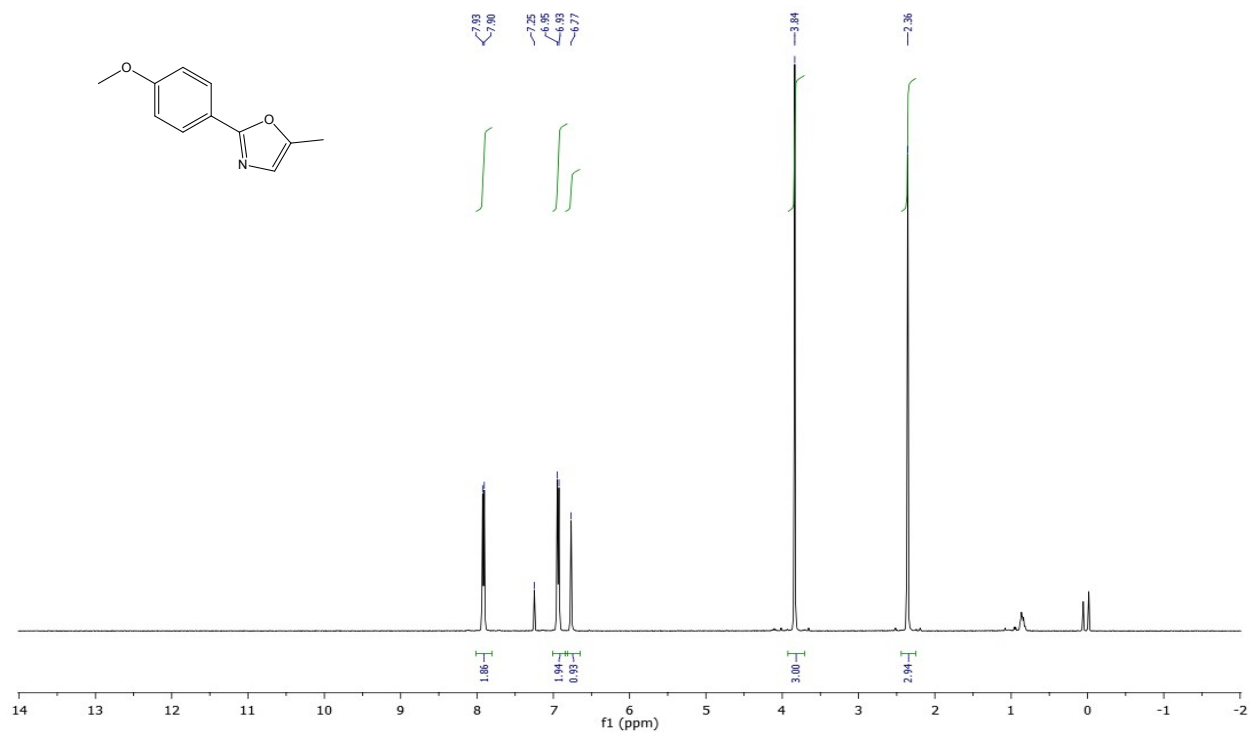

$^{13}\text{C}$  NMR spectrum of 5-methyl-2-(4-methoxyphenyl)-1,3-oxazole (**4c**)

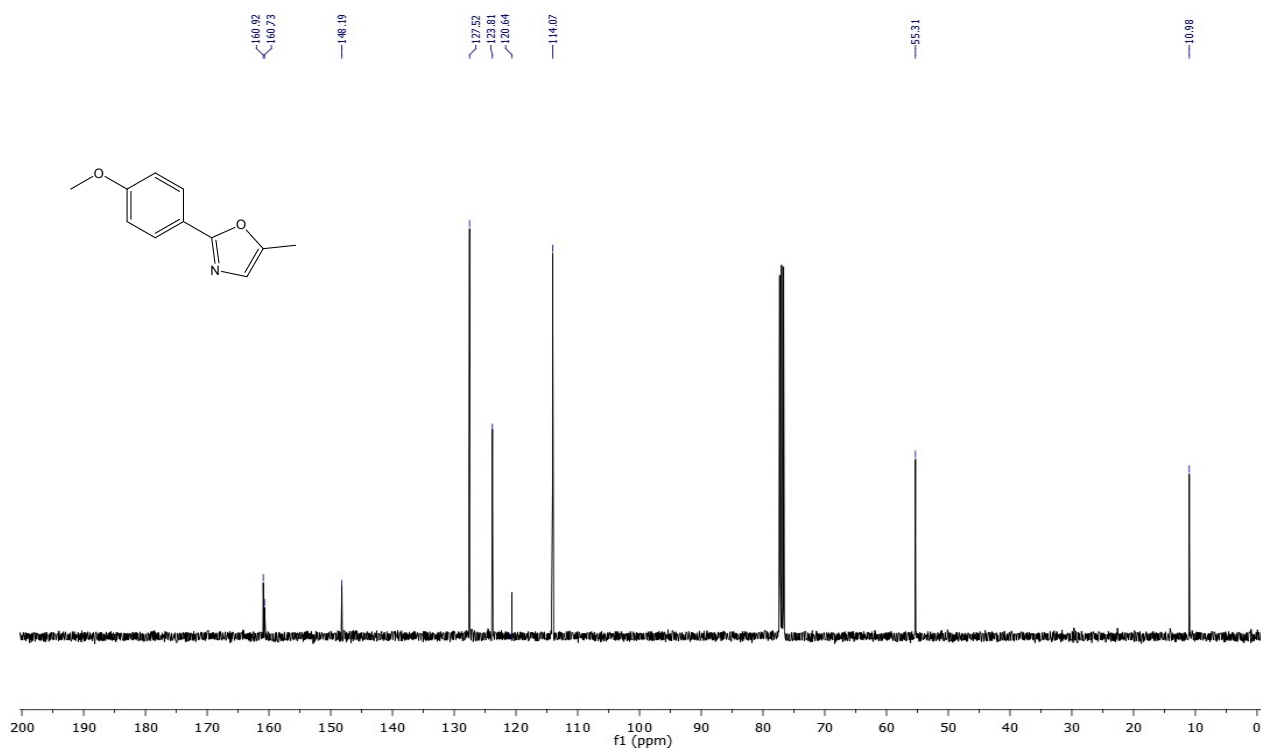

$^1\text{H}$  NMR spectrum of 5-methyl-2-(3-nitrophenyl)-1,3-oxazole (**4e**)

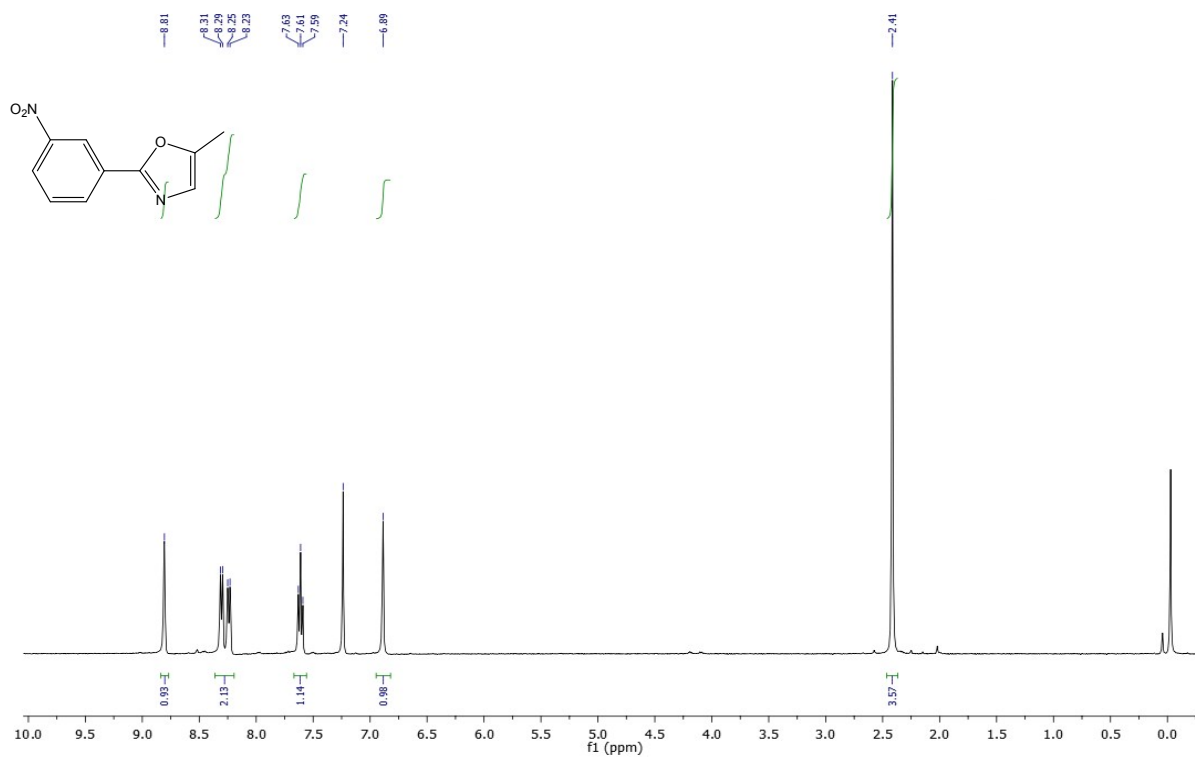



$^{13}\text{C}$  NMR spectrum of 5-methyl-2-(3-nitrophenyl)-1,3-oxazole (**4e**)

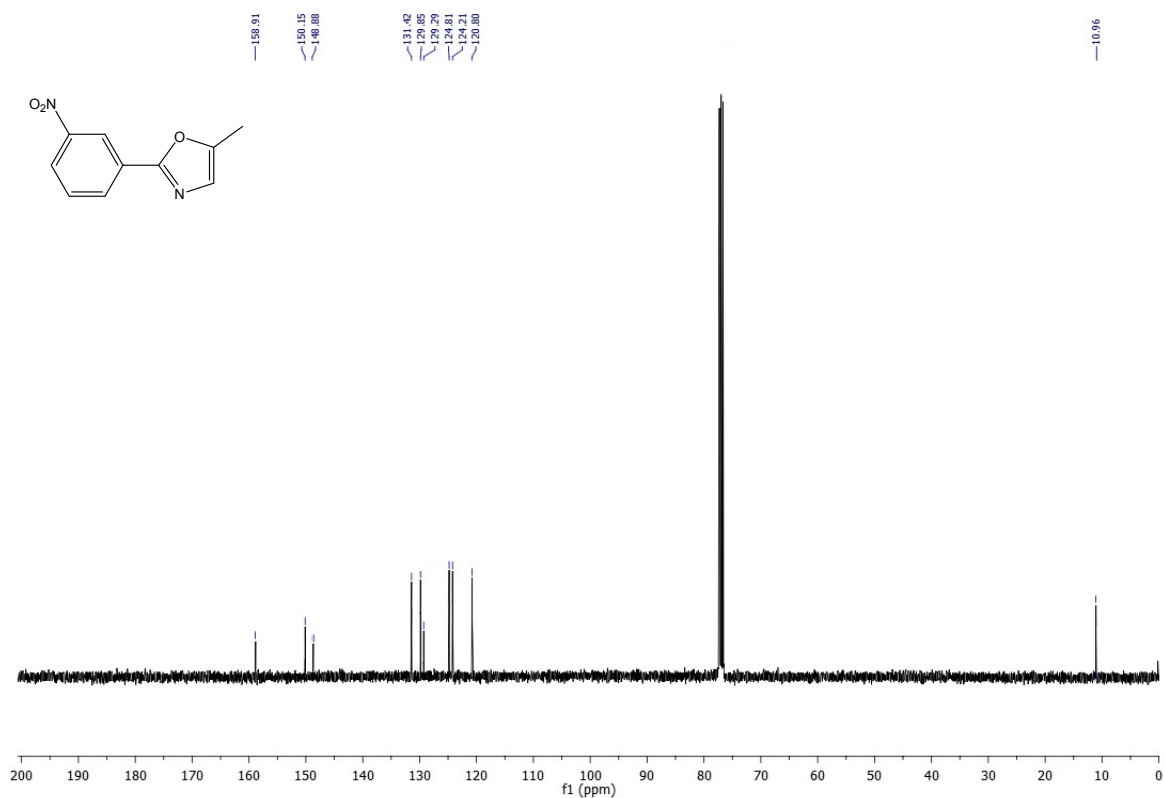

$^1\text{H}$  NMR spectrum of 2-(2-fluorophenyl)-5-methylene-1,3-oxazole (**4f**)

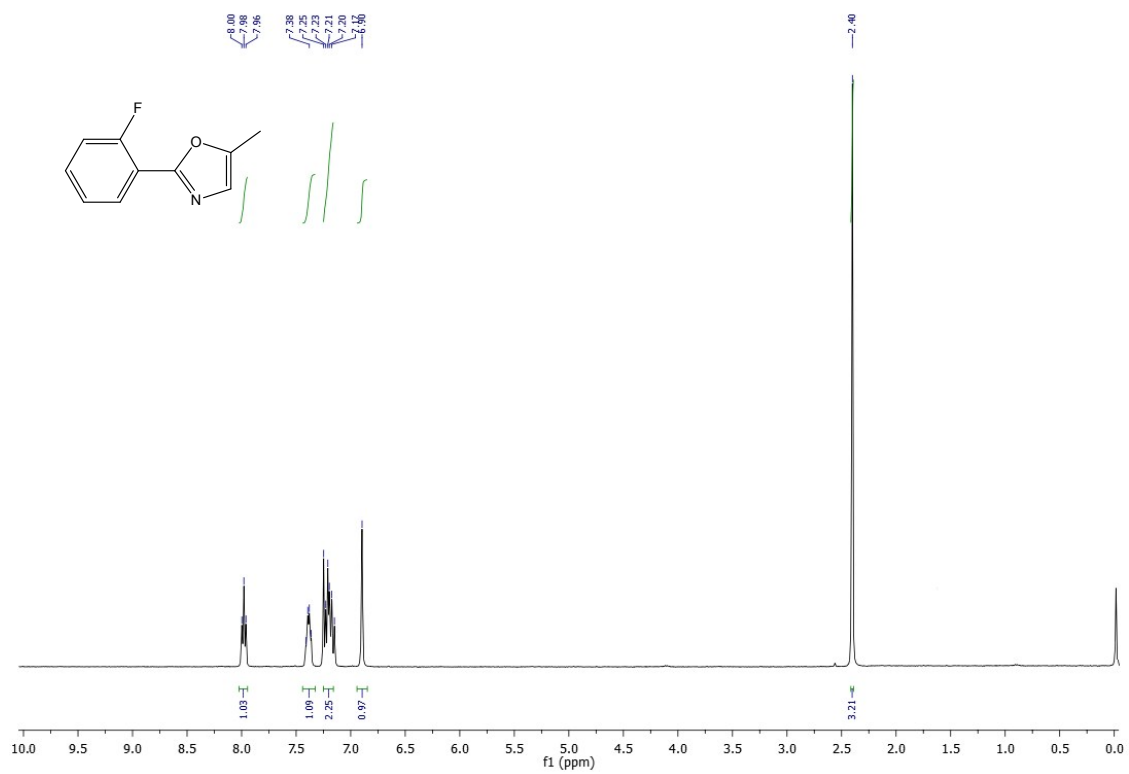

$^{13}\text{C}$  NMR spectrum of 2-(2-fluorophenyl)-5-methylene-1,3-oxazole (**4f**)

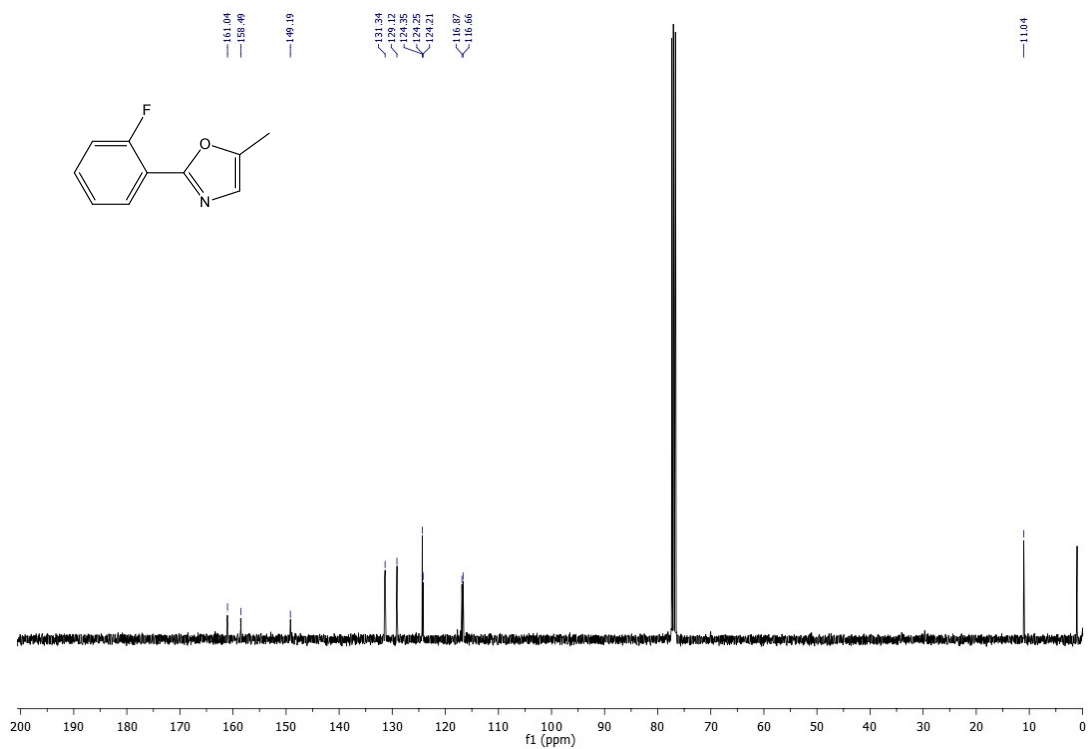

GC-MS Spectrum of 2-(2-fluorophenyl)-5-methylene-1,3-oxazole (**4f**)

T: + c EI Full ms [40.00-500.00]

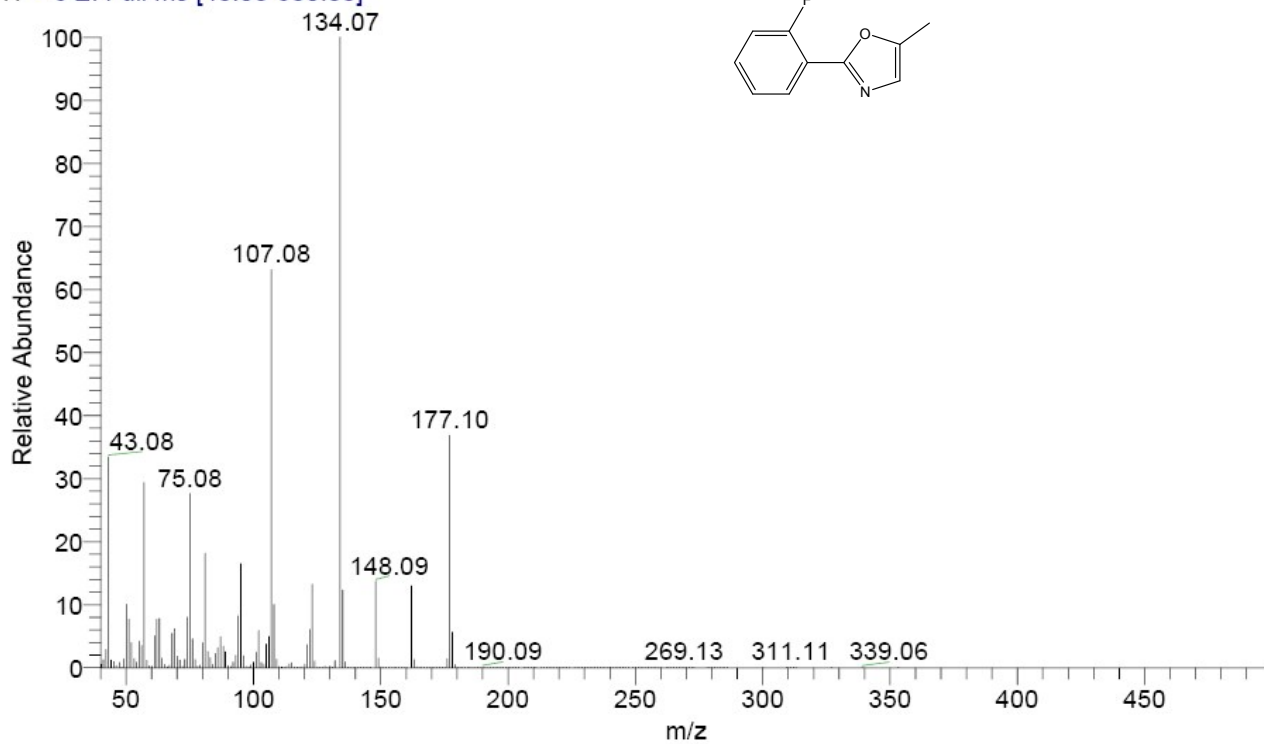

<sup>1</sup>H NMR spectrum of 5-methyl-2-(3,4-dimethoxyphenyl)-1,3-oxazole (**4g**)

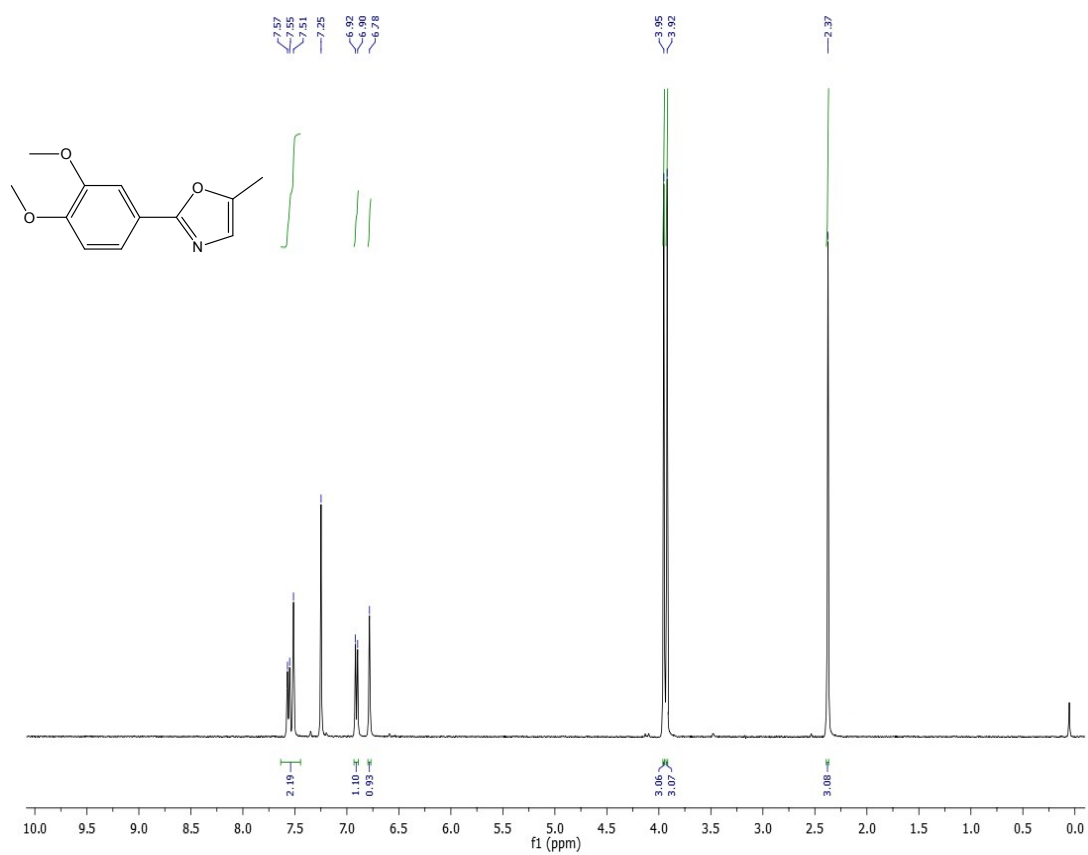

<sup>13</sup>C NMR spectrum of 5-methyl-2-(3,4-dimethoxyphenyl)-1,3-oxazole (**4g**)

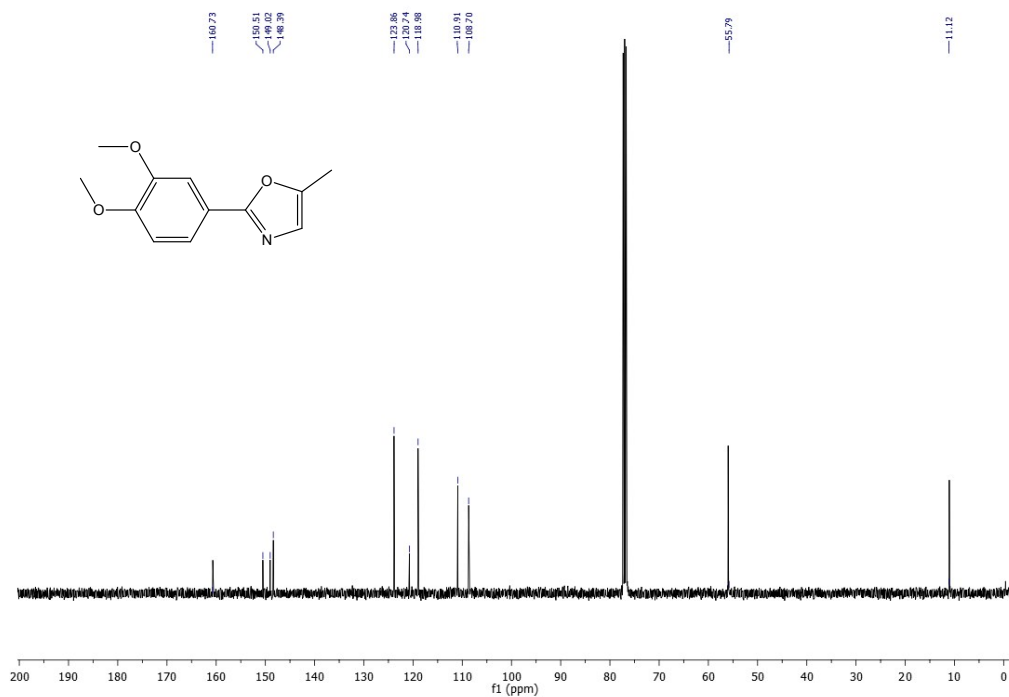

GC-MS Spectrum of 5-methyl-2-(3,4-dimethoxyphenyl)-1,3-oxazole (**4g**)

T: + c EI Full ms [40.00-500.00]

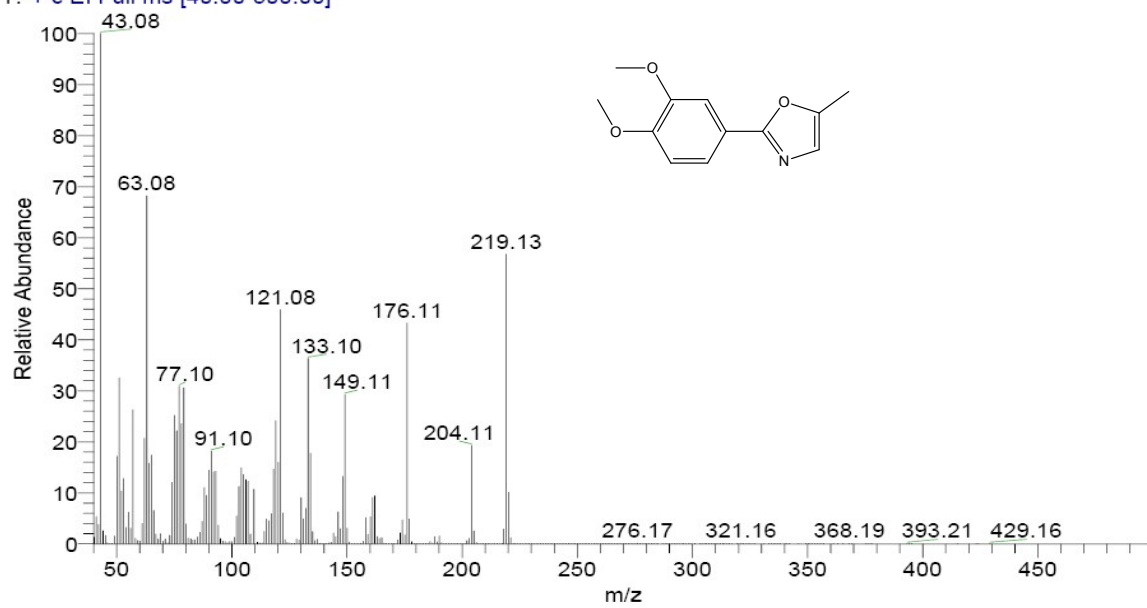

Supplement: c6ra25857c1.pdf [file c6ra25857c1.pdf]
